# Supplementary material for: Cyclooxygenase-2 Signalling Pathway in the Cortex is Involved in the Pathophysiological Mechanisms in the Rat Model of Depression
Source: PubMed Central journal article supplement (PMC5428817; doi:10.1038/s41598-017-00609-7), 2017-03-28

**Cyclooxygenase-2 Signalling Pathway in the Cortex is involved in the Pathophysiological Mechanisms in the Rat Model of Depression**

Qi Chen<sup>1</sup>, Ying Luo<sup>1</sup>, Shengnan Kuang<sup>1</sup>, Yang Yang<sup>1</sup>, Xiaoyan Tian<sup>1</sup>, Jie Ma<sup>1</sup>, Shaoshan Mai<sup>1</sup>, Lai Xue<sup>1</sup>, Junqing Yang<sup>1\*</sup>

<sup>1</sup> Department of Pharmacology, Chongqing Medical University, the Key Laboratory of Biochemistry and Molecular Pharmacology, Chongqing 400016, China

\*Corresponding author:

Prof. Junqing Yang,

Department of Pharmacology, Chongqing Medical University, Chongqing 400016, China;

Tel: +86-23-68485161; Fax: +86-23-68485161;

E-mail: [1139627371@qq.com](mailto:1139627371@qq.com)

Qi Chen and Ying Luo are co-first authors.

Supplementary Figure 3 The Original Western- blotting figure of PKAII  $\alpha$  reg protein for Figure 3

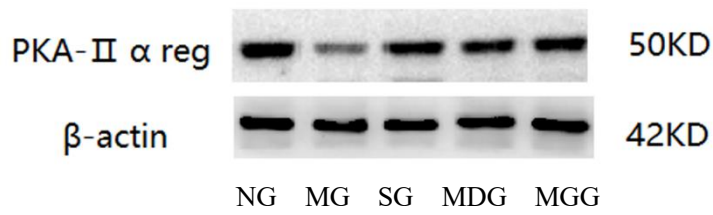

Supplementary Figure 7 The Original Western- blotting figure of COX2 protein for Figure 7

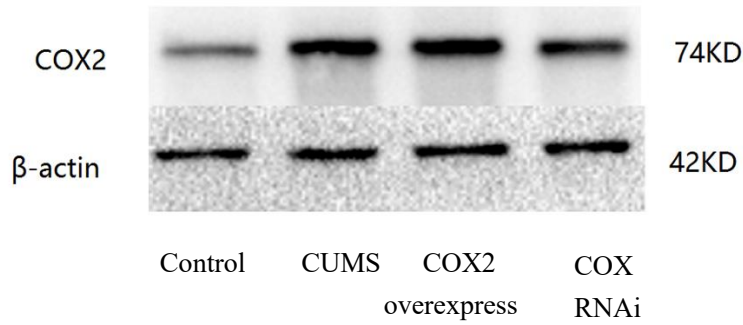

Supplementary Figure 7 The Original RT-PCR figure of COX2 mRNA for Figure 7

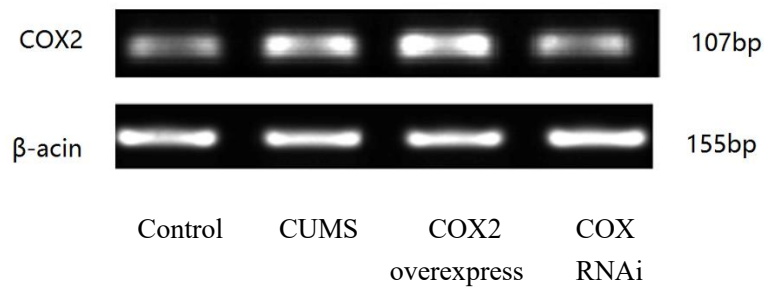

Supplementary Figure 8 The Original Western- blotting figure of EP2 protein for Figure 8

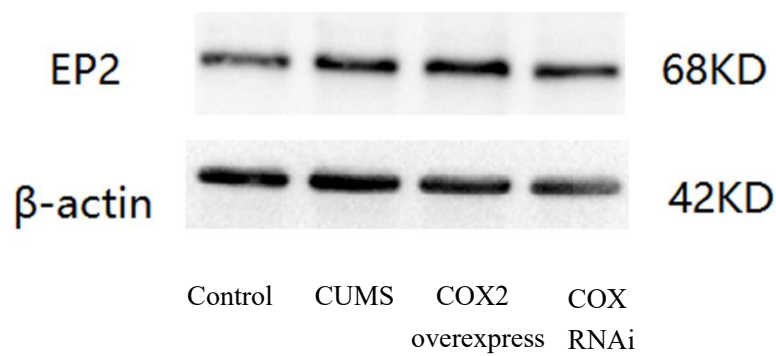

Supplementary Figure 8 The Original Western- blotting figure of EP3 protein for Figure 8

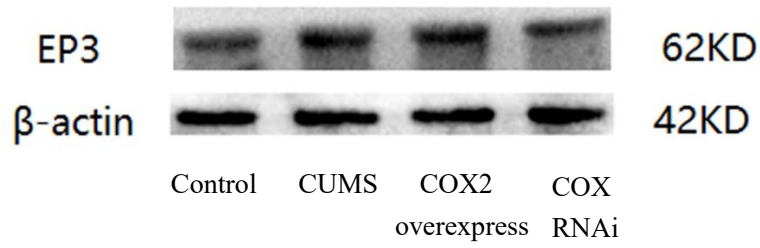

Supplementary Figure 8 The Original Western- blotting figure of BDNF protein for Figure 8

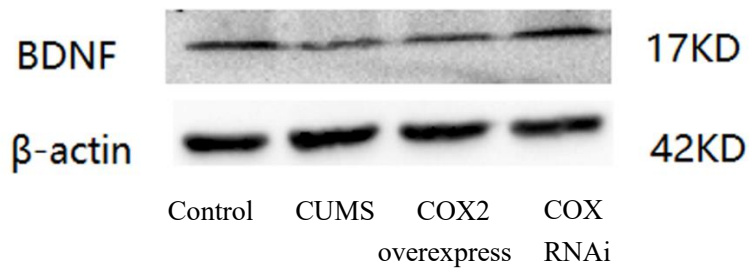

Supplementary Figure 8 The Original Western- blotting figure of PKA-II  $\alpha$  reg protein for Figure 8

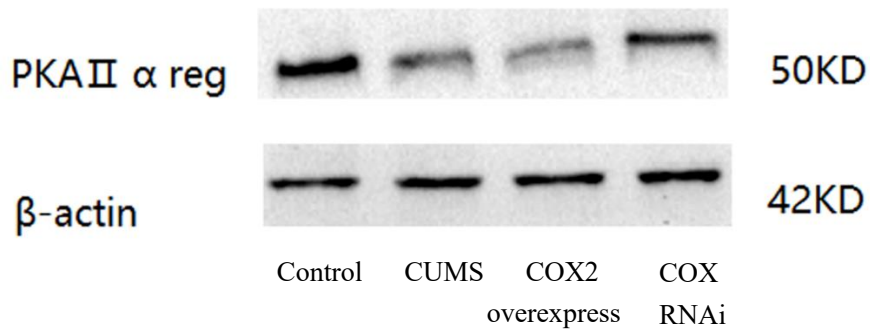

Supplementary Figure 8 The Original Western- blotting figure of p-CREB protein for Figure 8

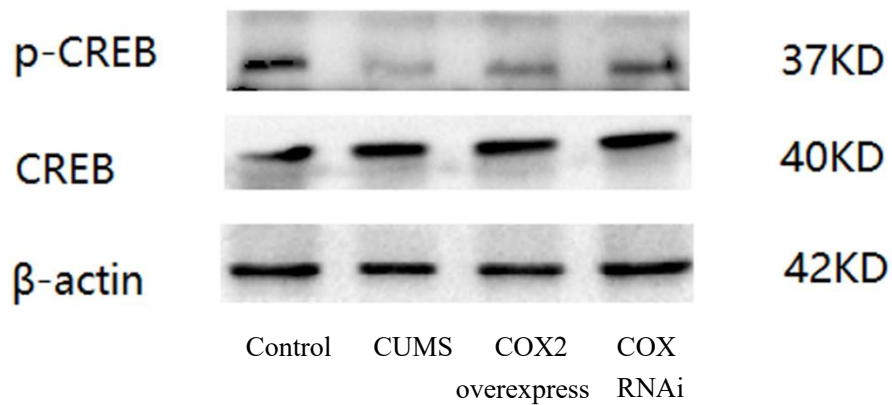

Supplement: 41598_2017_609_MOESM1_ESM.pdf [file 41598_2017_609_MOESM1_ESM.pdf]
